# Supplementary material for: Can alterations in MiR-21, MiR-1, and MiR-224 expression predict personalized medicine chemotherapy in non-small cell lung cancer?
Source: Research Square preprint supplement (doi:10.21203/rs.3.rs-7255974/v1), 2025-08-11
Supplement: Supplementary file 1 [file 61468fda76043eeef21bb6ad.docx]

Add 50 µg of tissue to 500 µL of TRIZOL(Qiagen CO) solution, then homogenize on ice with a micro homogenizer. 500 µL of TRIZOL solution and 300 µL of chloroform were added and vortexed in a microtube. The tubes were left at room temperature for 5 min and then centrifuged at 12,000 g for 5 min at 4°C. The upper layer containing the RNA was moved carefully to a fresh tube. Centrifuge the tubes at 12,000 g for 10 min at 4°C. The supernatant was discarded, and the  RNA pellet was washed with 75% ethanol(Qiagen Co). The tube was Centrifuged again at 7500 g for 5 min at 4°C. The supernatant was discarded, and the RNA pellet was dried in air to remove the ethanol. DEPC-treated water was added to the resulting precipitate and placed at 65 °C for 3 minutes to dissolve the precipitate slowly.
